# Supplementary material for: Pilot-scale ultrastable nitritation in municipal wastewater based on the loading rate switch strategy
Source: Research Square preprint supplement (doi:10.21203/rs.3.rs-2708162/v1), 2023-03-27
Supplement: Supplementary file 1 [file 37a66c4a457d027f0c524da7.pdf]

1  
2  
3  
4  
5  
6  
7  
8  
9  
10  
11  
12  
13  
14  
15

**Supplementary Information**

**Pilot-scale ultrastable nitrification in municipal wastewater based on the loading rate switch strategy**

Zihao Wang, Liang Zhang\*, Wei Zeng, Jialin Li, Qiong Zhang, Xiyao Li and  
Yongzhen Peng

National Engineering Laboratory for Advanced Municipal Wastewater Treatment and Reuse Technology, Engineering Research Center of Beijing, Beijing University of Technology, Beijing 100124, PR China

\*Corresponding author. E-mail: [zliang@bjut.edu.cn](mailto:zliang@bjut.edu.cn)

China Phone: (8610) 67392627 (O), Fax: (8610) 67392627 (O)

Contents

**Number of Pages: 9**

**Number of Tables: 3**

**Number of Figures: 2**

16

**Figure and Table captions**

17 **Supplementary Table 1:** Comparison of “Fresh Start” concept-based nitrification and  
18 selective elimination concept-based nitrification in low-ammonium municipal  
19 wastewater treatments.

20 **Supplementary Table 2:** Operation phase and condition of the reactor.

21 **Supplementary Table 3:** Experimental conditions for the batch tests.

22 **Supplementary Figure 1:** The influent and effluent total inorganic nitrogen (TIN),  
23  $\text{NH}_4^+\text{-N}$ ,  $\text{NO}_2^-\text{-N}$ ,  $\text{NO}_3^-\text{-N}$  concentrations, and TIN removal efficiency of the reactor in  
24 which the concentration of TIN was equal to the sum of the concentrations of  $\text{NH}_4^+\text{-N}$ ,  
25  $\text{NO}_2^-\text{-N}$  and  $\text{NO}_3^-\text{-N}$ .

26 **Supplementary Figure 2:** Typical variation in the substance concentrations. **a**,  
27 Variation in the nitrogen ( $\text{NH}_4^+\text{-N}$ ,  $\text{NO}_2^-\text{-N}$ ,  $\text{NO}_3^-\text{-N}$  and TIN), chemical oxygen  
28 demand (COD) and nitrite accumulation ratio (NAR). **b**, Variation in DO concentration,  
29 polyhydroxyalkanoates (PHAs), poly- $\beta$ -hydroxybutyrate (PHB), poly- $\beta$ -  
30 hydroxyvalerate (PHV) and Glycogen in which the concentration of PHAs was equal  
31 to the sum of the concentrations of PHB and PHV.

32 **Supplementary Table 1:** Comparison of “Fresh Start” concept-based nitrification and  
 33 selective elimination concept-based nitrification in low-ammonium municipal  
 34 wastewater treatments.

| NO. | Concept                  | Strategy              | Initiation<br>time (d) | Control                                                                  | Scale<br>(L) | T<br>(°C) | NAR<br>(%) | References |
|-----|--------------------------|-----------------------|------------------------|--------------------------------------------------------------------------|--------------|-----------|------------|------------|
| 1   | Fresh Start              | Loading rate switch   | 7                      | NH <sub>4</sub> <sup>+</sup> -N                                          | 6500         | 5.9–29.8  | >98        | This study |
| 2   | Selective<br>Elimination | Intermittent aeration | >50                    | NH <sub>4</sub> <sup>+</sup> /NO <sub>2</sub> <sup>-</sup> , COD,<br>SRT | 340          | 25        | 30–80      | 12         |
| 3   | Selective<br>Elimination | Real-time control     | >60                    | pH, SRT                                                                  | 54000        | 11.9–26.5 | >95        | 29         |
| 4   | Selective<br>Elimination | Low DO                | 45                     | DO, SRT, Temperature                                                     | 300          | 21±1      | 20–95      | 30         |
| 5   | Selective<br>Elimination | Low SRT               | >100                   | SRT, Temperature                                                         | 60           | 15±1      | >90        | 31         |
| 6   | Selective<br>Elimination | Hydroxylamine         | 19                     | pH, Temperature, SRT                                                     | 10           | 25±1      | >95        | 32         |
| 7   | Selective<br>Elimination | FA                    | 50                     | Temperature, SRT, DO                                                     | 4            | 22±1      | 15–92      | 33         |
| 8   | Selective<br>Elimination | FNA                   | 28                     | Temperature, SRT                                                         | 32           | 25±1      | 10–78      | 34         |

35

36 **Supplementary Table 2:** Operation phase and condition of the reactor.

37

| <b>Phase</b> | <b>Time (day)</b> | <b>Operation mode</b> | <b>Aeration time (h)</b> | <b>DO (mg/L)</b> | <b>T (°C)</b> | <b>MLSS (mg/L)</b> | <b>SRT (day)</b> |
|--------------|-------------------|-----------------------|--------------------------|------------------|---------------|--------------------|------------------|
| <b>I</b>     | 0–48              | An/O                  | 1–3                      | 1–3              | 20–30         | 2477–4200          | 15               |
| <b>II</b>    | 49–501            | An/O/A                | 2–8                      | 2–8              | 5.9–30        | 2500–5031          | >200             |

38 **Supplementary Table 3:** Experimental conditions for the batch tests.

| <b>Bath</b>                 | <b>Phase</b> | <b>Time (d)</b> | <b>Residual NH<sub>4</sub><sup>+</sup>-N (mg/L)</b> | <b>T (°C)</b> |
|-----------------------------|--------------|-----------------|-----------------------------------------------------|---------------|
| <b>Parent reactor</b>       | A/B          | 1–63            | 10±2                                                | 27±1.5        |
| <b>Experimental reactor</b> | A            | 1–31            | <1                                                  | 27±1.5        |
|                             | B            | 32–63           | 10±2                                                |               |

39

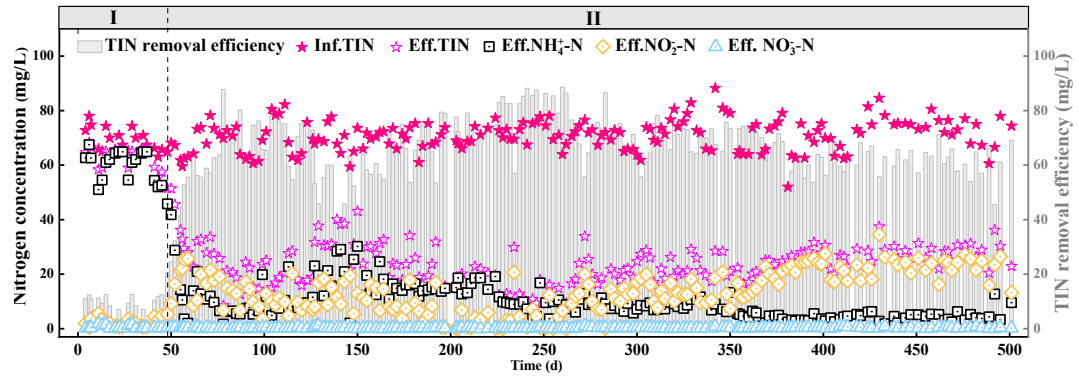

40

41 **Supplementary Figure 1:** The influent and effluent total inorganic nitrogen (TIN),

42  $\text{NH}_4^+\text{-N}$ ,  $\text{NO}_2^-\text{-N}$ ,  $\text{NO}_3^-\text{-N}$  concentrations, and TIN removal efficiency of the reactor in

43 which the concentration of TIN was equal to the sum of the concentrations of  $\text{NH}_4^+\text{-N}$ ,

44  $\text{NO}_2^-\text{-N}$  and  $\text{NO}_3^-\text{-N}$ .

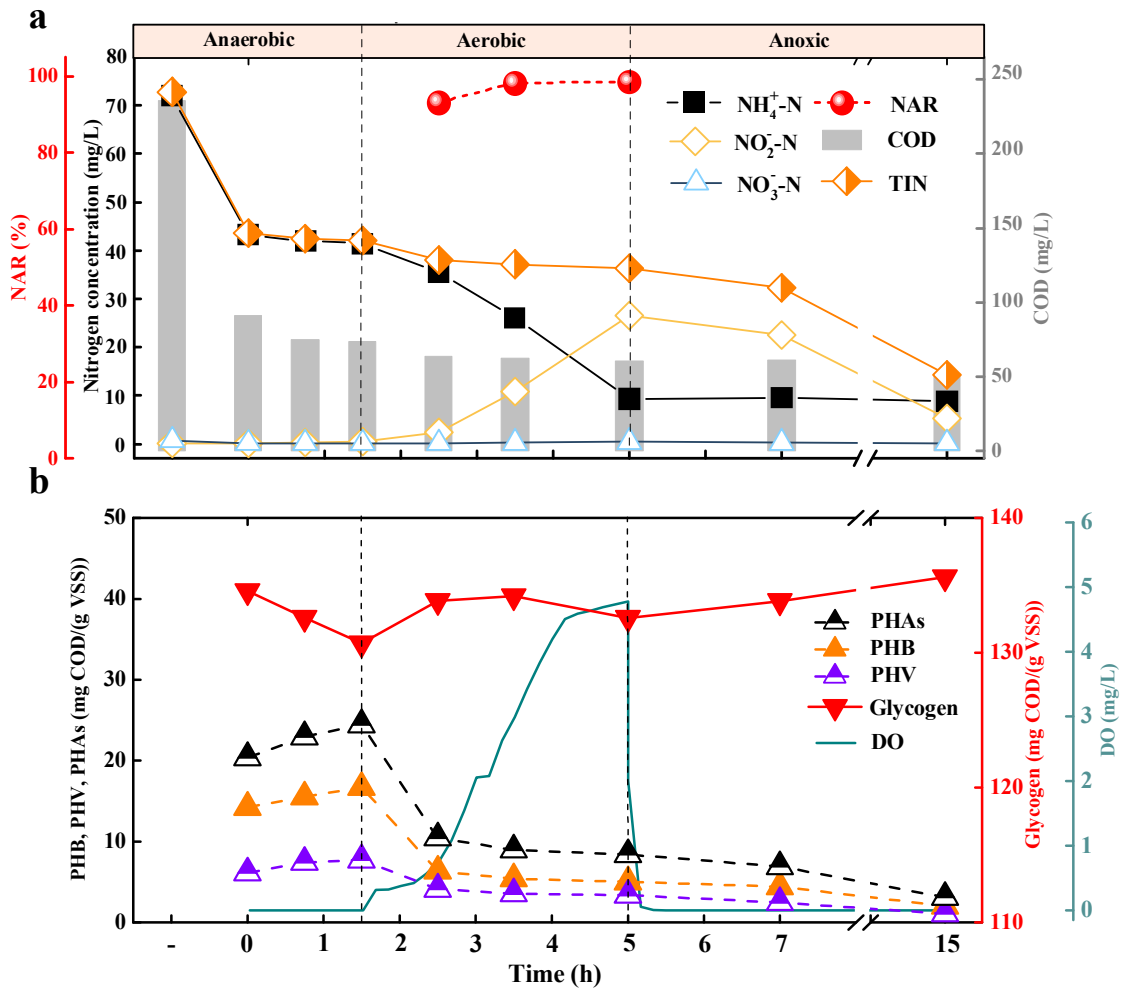

45

46

47 **Supplementary Figure 2:** Typical variation in the substance concentrations. **a**,

48 Variation in the nitrogen ( $\text{NH}_4^+\text{-N}$ ,  $\text{NO}_2^-\text{-N}$ ,  $\text{NO}_3^-\text{-N}$  and TIN), chemical oxygen demand

49 (COD) and nitrite accumulation ratio (NAR). **b**, Variation in DO concentration,

50 polyhydroxyalkanoates (PHAs), poly- $\beta$ -hydroxybutyrate (PHB), poly- $\beta$ -

51 hydroxyvalerate (PHV) and Glycogen in which the concentration of PHAs was equal

52 to the sum of the concentrations of PHB and PHV.

- 53           29. Yang, Q. et al. Nitrogen removal via nitrite from municipal wastewater at low  
54 temperatures using real-time control to optimize nitrifying communities. *Environ. Sci.*  
55 *Technol.* **41**, 8159–8164 (2007).
- 56           30. Ma, Y., Peng, Y.Z., Wang, S.Y., Yuan, Z.G. & Wang, X.L. Achieving nitrogen  
57 removal via nitrite in a pilot-scale continuous pre-denitrification plant. *Water Res.* **43**,  
58 563–572 (2009).
- 59           31. Yuan, Q. & Oleszkiewicz, J. A. Low temperature biological phosphorus  
60 removal and partial nitrification in a pilot sequencing batch reactor system. *Water Sci.*  
61 *Technol.* **63**, 2802–2807 (2011).
- 62           32. Li, J., Zhang, L., Liu, J., Lin, J. & Peng, Y. Hydroxylamine addition and real-  
63 time aeration control in sewage nitrification system for reduced start-up period and  
64 improved process stability. *Bioresour. Technol.* **294**, 122183 (2019).
- 65           33. Wang, Z. et al. Unravelling adaptation of nitrite-oxidizing bacteria in  
66 mainstream PN/A process: Mechanisms and counter-strategies. *Water Res.* **200**, 117239  
67 (2021).
- 68           34. Ma, B. et al. Free nitrous acid pretreatment of wasted activated sludge to  
69 exploit internal carbon source for enhanced denitrification. *Bioresour. Technol.* **179**,  
70 20–25 (2015).
